# Supplementary material for: HLA-associated outcomes in peanut oral immunotherapy trials identify mechanistic and clinical determinants of therapeutic success
Source: PubMed Central journal article supplement (PMC9717393; doi:10.3389/fimmu.2022.941839), 2022-11-18
Supplement: Image_1.pdf [file Image_1.pdf]

**Figure S1: Overview of the IMPACT and POISED clinical trials.** The study design and key features of IMPACT (5) and POISED (6) clinical trials adapted from original publications are shown here. A summary of treatment groups, time points at which double blinded placebo controlled food challenges (DBPCFCs) were performed, and timepoints at which levels of pslgG4 were measured in both studies are shown below in the study schematics.

## IMPACT

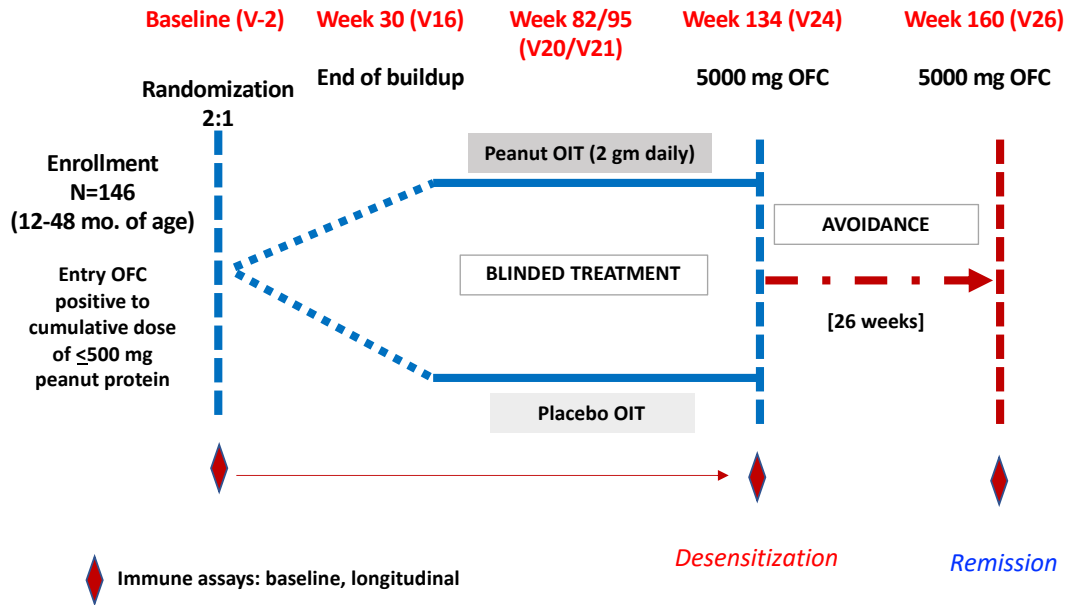

## POISED

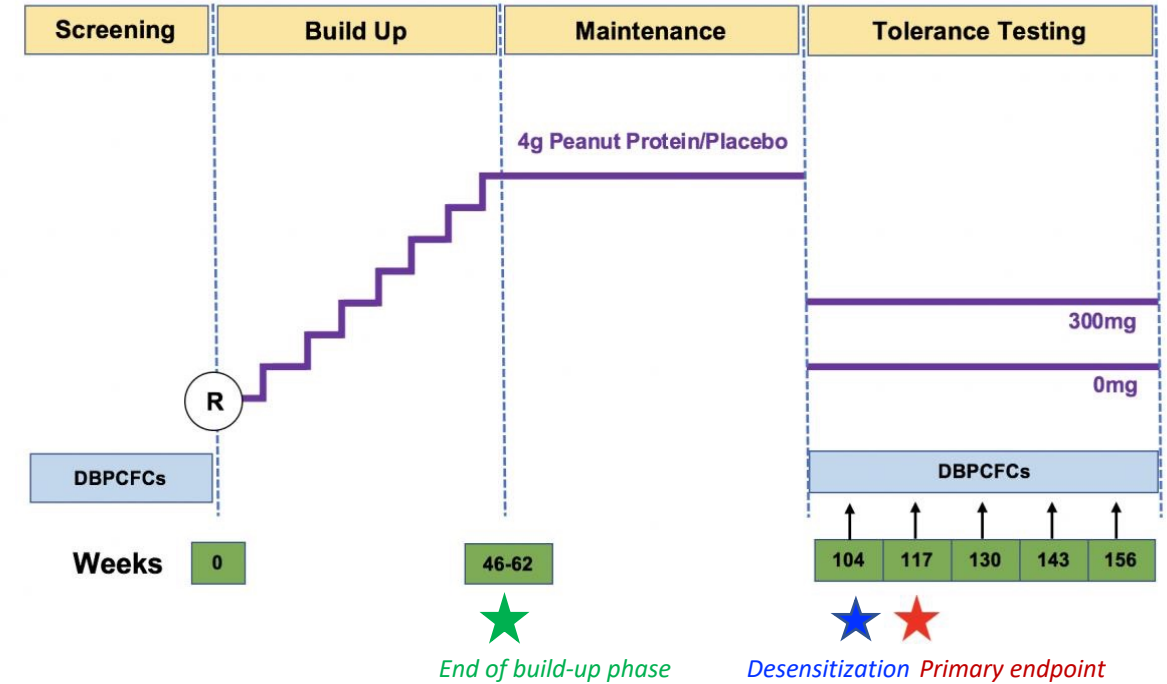

|        |                      |   |   |   |   |                                |  |  |   |   |   |   |   |
|--------|----------------------|---|---|---|---|--------------------------------|--|--|---|---|---|---|---|
| Groups | Peanut OIT & Placebo |   |   |   |   | Peanut 300, Peanut 0 & Placebo |  |  |   |   |   |   |   |
| DBPCFC | ↑                    |   |   | ↑ | ↑ | ↑                              |  |  | ↑ | ↑ | ↑ | ↑ | ↑ |
| IgG4   | ↑                    | ↑ | ↑ | ↑ | ↑ | ↑                              |  |  | ↑ | ↑ |   |   |   |
