# Supplementary material for: HLA-associated outcomes in peanut oral immunotherapy trials identify mechanistic and clinical determinants of therapeutic success
Source: PubMed Central journal article supplement (PMC9717393; doi:10.3389/fimmu.2022.941839), 2022-11-18

**Figure S2:** Distribution of pslgG4, and component specific IgG4 to Ara h2 and Ara h6 in the IMPACT participants by intervention (Placebo and PnOIT) and HLA-DQA1\*01:02 carrier status (NC = non-carrier, C = carrier). Significance associations from Table 2 are indicated in red.

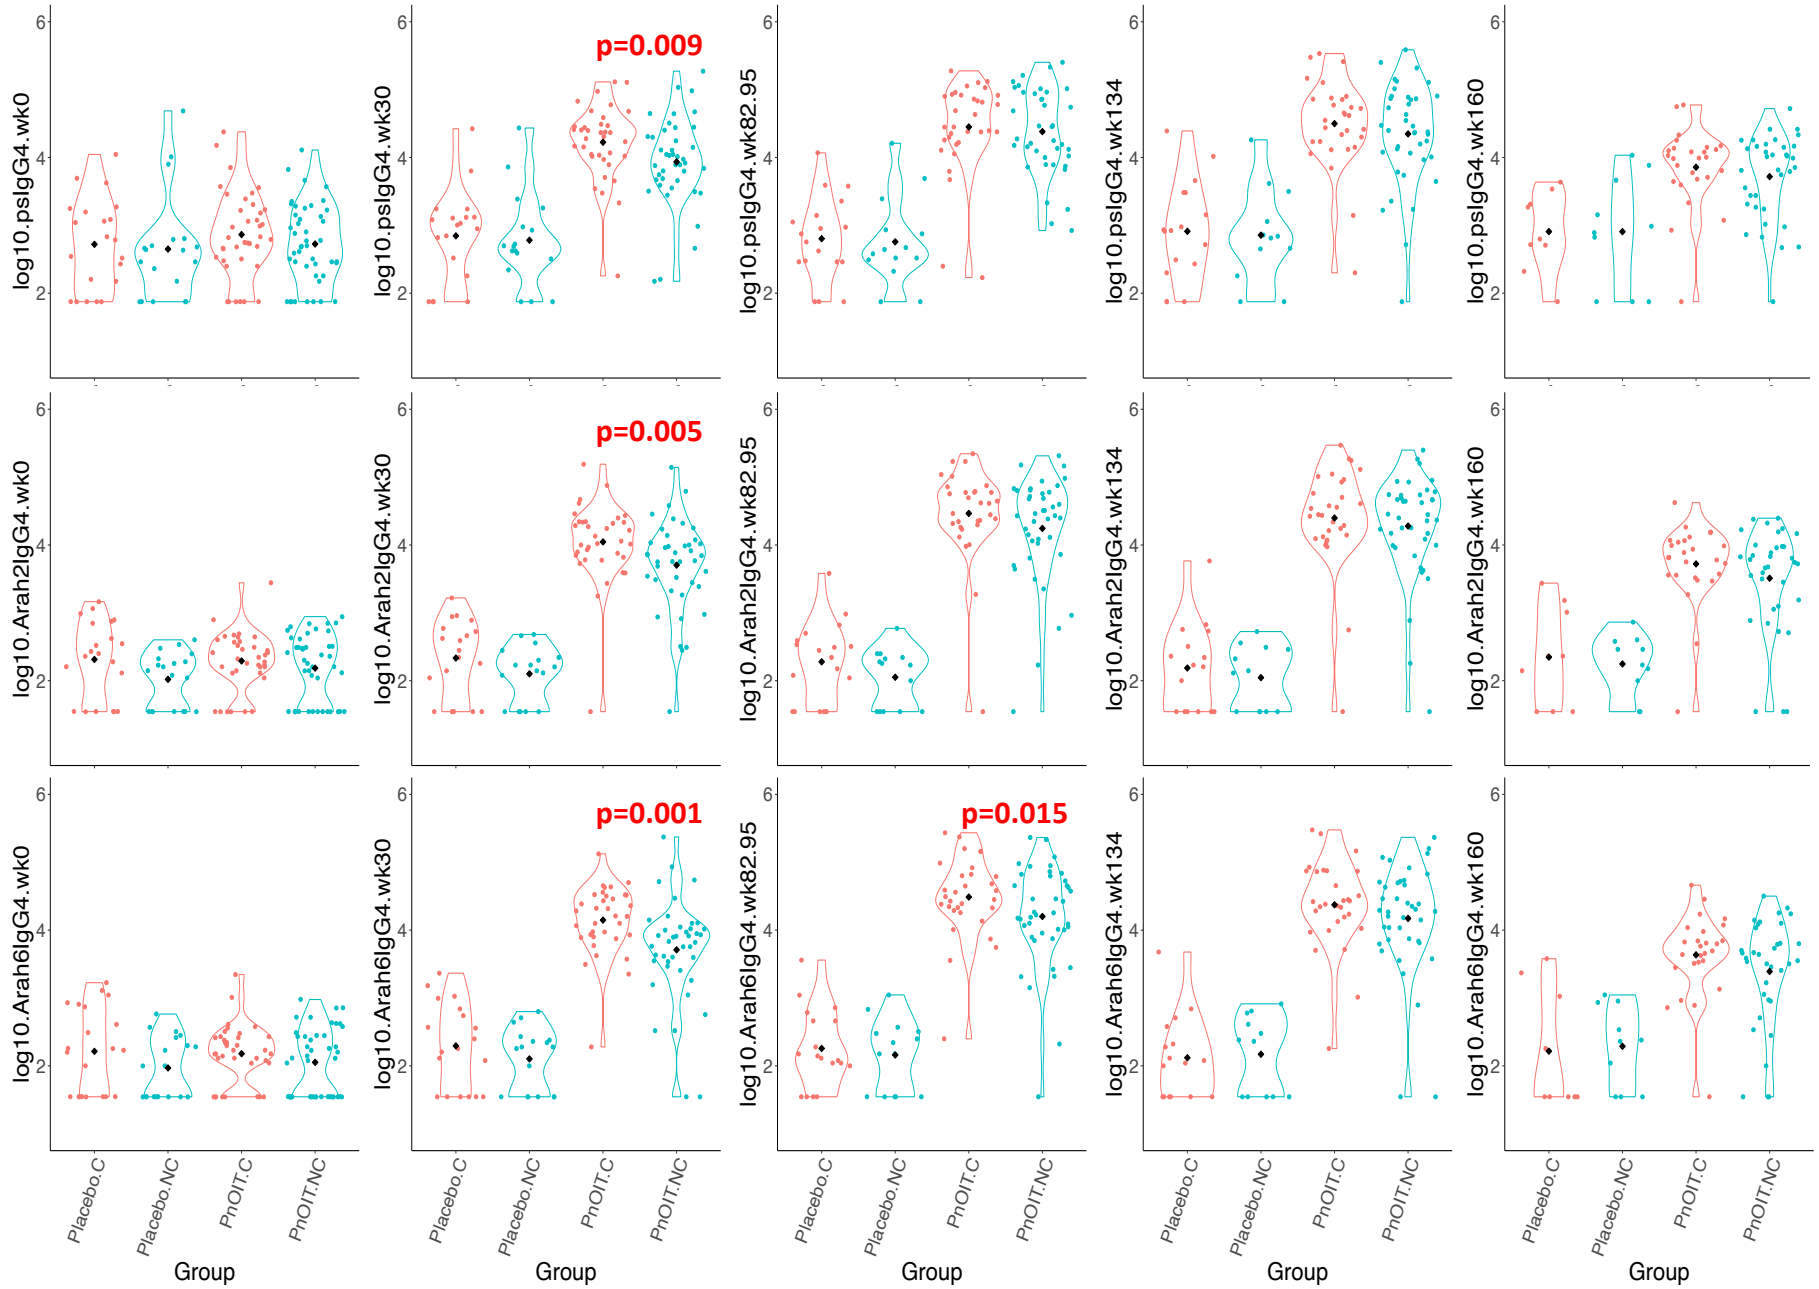

Supplement: Image_2.pdf [file Image_2.pdf]
